# Supplementary material
Source: PubMed Central journal article supplement (PMC6095134)
Supplement: NIHMS727850-supplement-2.pdf [file NIHMS727850-supplement-2.pdf]

## Supplementary table 1

|           | abs corr>0.6<br>Max jump<br>dis<0.4 | abs corr>0.7<br>Max jump<br>dis<0.4 | abs corr>0.7<br>Max jump<br>dis<0.3 | No. of candidate<br>events |
|-----------|-------------------------------------|-------------------------------------|-------------------------------------|----------------------------|
| e1s1      | 0.4829                              | 0.3319                              | 0.3959                              | 9818                       |
| e2s1      | 0.5359                              | 0.2843                              | 0.5439                              | 9696                       |
| e3s1      | 0.3785                              | 0.1330                              | 0.5539                              | 10022                      |
| sal e1e1  | 0.0002                              | 0.0002                              | 0.0002                              | 3277                       |
| sal e1s2  | 0.0152                              | 0.0074                              | 0.0368                              | 4981                       |
| sal e2e2  | 0.0002                              | 0.0002                              | 0.0002                              | 3631                       |
| sal e3e3  | 0.0002                              | 0.0002                              | 0.0002                              | 4440                       |
| sal e1s3  | 0.0090                              | 0.0056                              | 0.0312                              | 15604                      |
| sal e2s3  | 0.0164                              | 0.0428                              | 0.0196                              | 16652                      |
| sal e3s3  | 0.0370                              | 0.0222                              | 0.0148                              | 16637                      |
| cpp e1e1  | 0.0002                              | 0.0002                              | 0.0002                              | 3516                       |
| cpp e1s2  | 0.0005                              | 0.0202                              | 0.0208                              | 5544                       |
| cpp e2e2  | 0.3911                              | 0.4923                              | 0.2414                              | 3543                       |
| cpp e3e3  | 0.6997                              | 1                                   | 1                                   | 3851                       |
| cpp e1s3  | 0.0016                              | 0.0012                              | 0.0020                              | 16945                      |
| cpp e2s3  | 0.1010                              | 0.4849                              | 0.2941                              | 17609                      |
| cpp e3s3  | 0.4231                              | 0.4577                              | 0.4075                              | 16517                      |
| Poisson   | 0.4727                              | 0.2026                              | 0.1916                              | 9818                       |
| Time swap | 0.9436                              | 0.7962                              | 0.9510                              | 9818                       |

## Supplementary table 2

| Rats and Conditions |     | Session | Sleep1 |      |      | Run1 | Sleep2 | Run2 | Run3 | Sleep3 |      |      |
|---------------------|-----|---------|--------|------|------|------|--------|------|------|--------|------|------|
|                     |     |         | e1s1   | e2s1 | e3s1 | e1e1 | e1s2   | e2e2 | e3e3 | e1s3   | e2s3 | e3s3 |
| Rat D               | sal | D1202   | 1167   | 1104 | 1322 | 332  | 836    | 468  | 567  | 2354   | 2600 | 2673 |
|                     | cpp | D1203   |        |      |      | 177  | 764    | 474  | 576  | 1342   | 1356 | 1194 |
| Rat E               | cpp | E0210   | 858    | 870  | 922  | 260  | 551    | 346  | 386  | 3262   | 3224 | 3143 |
|                     | sal | E0211   |        |      |      | 173  | 696    | 268  | 365  | 2331   | 2329 | 2389 |
| Rat F               | sal | F0715   | 1013   | 1072 | 977  | 640  | 549    | 566  | 770  | 1891   | 1803 | 1758 |
|                     | cpp | F0716   |        |      |      | 447  | 948    | 157  | 523  | 2784   | 3031 | 2670 |
|                     | sal | F0718   | 1374   | 1309 | 1364 | 583  | 783    | 441  | 407  | 2611   | 2436 | 2419 |
|                     | cpp | F0719   | 1290   | 1267 | 1318 | 852  | 719    | 578  | 530  | 2561   | 2890 | 3142 |
|                     | cpp | F0722   | 1953   | 1950 | 1987 | 620  | 906    | 357  | 643  | 2514   | 2631 | 2712 |
| Rat G               | sal | G0831   |        |      |      | 508  | 657    | 679  | 500  | 1114   | 2491 | 2548 |
|                     | sal | G0903   | 1186   | 1209 | 1183 | 476  | 601    | 545  | 1088 | 2468   | 2308 | 2440 |
|                     | cpp | G0904   | 977    | 915  | 949  | 675  | 732    | 932  | 384  | 2206   | 2060 | 1075 |
|                     | sal | G0906   |        |      |      | 565  | 859    | 664  | 743  | 2835   | 2685 | 2410 |
|                     | cpp | G0910   |        |      |      | 485  | 924    | 699  | 809  | 2276   | 2417 | 2581 |

**Supplementary Table 1. P-values for trajectory events and the number of candidate events for all runs and conditions.** P-values under three pairs of detection thresholds (green star denoted in previous figures) are shown. Runs and events categories are as described in the legend of Supplementary Figure 5. Total numbers of candidate events for each category are also included in the last column of the table.

**Supplementary Table 2. Number of candidate events for each rat and each session under different epochs.**
